1 **The Subtype Specificity of Genetic Loci Associated with Stroke in 16,664 cases and**  
2 **32,792 controls**

3

4 Matthew Traylor<sup>1</sup>, Christopher D. Anderson<sup>2,3,4,5</sup>, Loes C.A. Rutten-Jacobs<sup>6</sup>, Guido J.  
5 Falcone<sup>7</sup>, Mary E. Comeau<sup>8</sup>, Hakan Ay<sup>9,10</sup>, Cathie L.M. Sudlow<sup>11,12</sup>, Huichun Xu<sup>13</sup>, Braxton D.  
6 Mitchell<sup>13,14</sup>, John Cole<sup>13,15</sup>, Kathryn Rexrode<sup>16</sup>, Jordi Jimenez-Conde<sup>17,18</sup>, Reinhold Schmidt<sup>19</sup>,  
7 Raji P. Grewal<sup>20</sup>, Ralph Sacco<sup>21</sup>, Marta Ribases<sup>22,23,24</sup>, Tatjana Rundek<sup>21</sup>, Jonathan  
8 Rosand<sup>2,3,4,5</sup>, Martin Dichgans<sup>25,26</sup>, Jin-Moo Lee<sup>27</sup>, Carl D. Langefeld<sup>8</sup>, Steven J. Kittner<sup>14,28</sup>,  
9 Hugh S. Markus<sup>1</sup>, Daniel Woo<sup>29</sup>, Rainer Malik<sup>25</sup>, on behalf of the NINDS Stroke Genetics  
10 Network (SiGN) and International Stroke Genetics Consortium (ISGC)

11 <sup>1</sup> Stroke Research Group, Department of Clinical Neurosciences, University of Cambridge, UK

12 <sup>2</sup> Center for Genomic Medicine, Massachusetts General Hospital (MGH), Boston, MA, USA.

13 <sup>3</sup> J. Philip Kistler Stroke Research Center, Department of Neurology, MGH, Boston, MA, USA.

14 <sup>4</sup> Program in Medical and Population Genetics, Broad Institute, Cambridge, MA, USA.

15 <sup>5</sup> Division of Neurocritical Care and Emergency Neurology, Department of Neurology, MGH,  
16 Boston, MA, USA

17 <sup>6</sup> German Center for Neurodegenerative Diseases, Population Health Sciences, Bonn,  
18 Germany

19 <sup>7</sup> Division of Neurocritical Care and Emergency Neurology, Department of Neurology, Yale  
20 School of Medicine, New Haven, CT, USA

21 <sup>8</sup> Department of Biostatistical Sciences, Division of Public Health Sciences, School of  
22 Medicine, Wake Forest University, Winston-Salem, North Carolina, USA.

23 <sup>9</sup> Stroke Service, Massachusetts General Hospital, Boston, MA, USA.

24 <sup>10</sup> A.A. Martinos Center for Biomedical Imaging, Department of Radiology, Massachusetts  
25 General Hospital, Boston, MA, USA.

26 <sup>11</sup> Centre for Clinical Brain Sciences, University of Edinburgh, Edinburgh, UK

27 <sup>12</sup> Usher Institute of Population Health Sciences and Informatics, Nine Bioquarter, Edinburgh,  
28 UK

29 <sup>13</sup> Division of Endocrinology, Diabetes and Nutrition, Department of Medicine, University of  
30 Maryland School of Medicine, Baltimore, MD, USA

31 <sup>14</sup> Geriatrics Research and Education Clinical Center, Baltimore Veterans Administration  
32 Medical Center, Baltimore, MD, USA.

33 <sup>15</sup> Department of Neurology, Veterans Affairs Medical Center, Baltimore, MD, USA

34 <sup>16</sup> Channing Division of Network Medicine and Division of Women's Health, Department of  
35 Medicine, Brigham and Women's Hospital, Boston, MA

36 <sup>17</sup> Neurovascular Research Unit, Department of Neurology, Institut Municipal d'Investigació  
37 Medica-Hospital del Mar, Universitat Autònoma de Barcelona, Barcelona, Spain.

38 <sup>18</sup> Program in Inflammation and Cardiovascular Disorders, Institut Municipal d'Investigació  
39 Medica-Hospital del Mar, Universitat Autònoma de Barcelona, Barcelona, Spain.

40 <sup>19</sup> Department of Neurology, Medical University of Graz, Austria.

41 <sup>20</sup> Neuroscience Institute, Saint Francis Medical Center, School of Health and Medical  
42 Sciences, Seton Hall University, South Orange, NJ.

43 <sup>21</sup> Department of Neurology, Miller School of Medicine, University of Miami, Miami, FL.

44 <sup>22</sup> Psychiatric Genetics Unit, Group of Psychiatry, Mental Health and Addiction, Vall d'Hebron  
45 Research Institute (VHIR), Universitat Autònoma de Barcelona, Barcelona, Spain.

46 <sup>23</sup> Department of Psychiatry, Hospital Universitari Vall d'Hebron, Barcelona, Spain.

47 <sup>24</sup> Biomedical Network Research Centre on Mental Health (CIBERSAM), Instituto de Salud  
48 Carlos III, Barcelona, Spain.

49 <sup>25</sup> Institute for Stroke and Dementia Research, Klinikum der Universität München, Ludwig-  
50 Maximilians-Universität München, Munich, Germany.

51 <sup>26</sup> Munich Cluster for Systems Neurology (SyNergy), Munich, Germany

52 <sup>27</sup> Department of Neurology, Radiology, and Biomedical Engineering, Washington University  
53 School of Medicine, St. Louis, MO, USA.

54 <sup>28</sup> Department of Neurology, University of Maryland School of Medicine, Baltimore, MD, USA.

55 <sup>29</sup> Department of Neurology and Rehabilitation Medicine and Comprehensive Stroke Center,  
56 University of Cincinnati, OH, USA

57

58 Corresponding Author:

59 Dr Matthew Traylor

60 Stroke Research Group

61 R3, Box 83

62 Department of Clinical Neurosciences

63 University of Cambridge

64 CB2 0QQ,

65 United Kingdom

66 +44 01273 217697

67 [mt628@medschl.cam.ac.uk](mailto:mt628@medschl.cam.ac.uk)

68 **Abstract**

69 Background: Genome-wide association studies have identified multiple loci associated with  
70 stroke. However, the specific stroke subtypes affected, and whether loci influence both  
71 ischaemic and haemorrhagic stroke, remains unknown. For loci associated with stroke, we  
72 aimed to infer the combination of stroke subtypes likely to be affected, and in doing so assess  
73 the extent to which such loci have homogeneous effects across stroke subtypes.

74 Methods: We performed Bayesian multinomial regression in 16,664 stroke cases and 32,792  
75 controls of European ancestry to determine the most likely combination of stroke subtypes  
76 affected for loci with published genome-wide stroke associations, using model selection.  
77 Cases were subtyped under two commonly used stroke classification systems, Trial of Org  
78 10172 Acute Stroke Treatment (TOAST) and Causative Classification of Stroke (CCS). All  
79 individuals had genotypes imputed to the Haplotype Reference Consortium 1.1 Panel.

80 Results: Sixteen loci were considered for analysis. Seven loci influenced both haemorrhagic  
81 and ischaemic stroke, three of which influenced ischaemic and haemorrhagic subtypes under  
82 both TOAST and CCS. Under CCS, 4 loci influenced both small vessel stroke and  
83 intracerebral haemorrhage. An *EDNRA* locus demonstrated opposing effects on ischaemic  
84 and haemorrhagic stroke. No loci were predicted to influence all stroke subtypes in the same  
85 direction and only one locus (12q24) was predicted to influence all ischaemic stroke subtypes.

86 Conclusions: Heterogeneity in the influence of stroke-associated loci on stroke subtypes is  
87 pervasive, reflecting differing causal pathways. However, overlap exists between  
88 haemorrhagic and ischaemic stroke, which may reflect shared pathobiology predisposing to  
89 small vessel arteriopathy. Stroke is a complex, heterogeneous disorder requiring tailored  
90 analytic strategies to decipher genetic mechanisms.

91 Keywords: Stroke, Multinomial, *EDNRA*, Genetics, intracerebral haemorrhage

## 92 **Introduction**

93 The burden of stroke on global healthcare and society is substantial; it is consistently one of  
94 the leading causes of death and disability worldwide, [1] and a major cause of cognitive  
95 impairment and dementia. However, there exist significant gaps in our understanding of the  
96 pathological processes that underlie the disease. In recent years genome-wide association  
97 studies (GWAS) have made considerable advances in identifying genetic components  
98 underlying complex traits, in many cases identifying novel disease pathways and  
99 treatments.[2]

100

101 Characterizing the genetic component to stroke has been challenging, in part due to clinical  
102 heterogeneity, with at least three distinct major pathological processes (cardioembolism, large  
103 artery atherosclerosis, small vessel disease) underlying the majority of ischaemic strokes; and  
104 two processes underlying the majority of intracerebral haemorrhagic stroke (small vessel  
105 disease and cerebral amyloid angiopathy). [3, 4] However, recent GWAS have made  
106 considerable advances; 32 independent genome-wide significant loci were identified in the  
107 MEGASTROKE project. [5] The majority of these loci were identified as being associated with  
108 inclusive 'all stroke' or 'ischaemic stroke' categories, rather than specific stroke subtypes. This  
109 is in part due to study design, with much larger samples for these broader categories and only  
110 a fraction of stroke cases having detailed phenotyping. Indeed, this finding is in contrast to  
111 earlier studies that identified loci such as *HDAC9*, *PITX2* as being associated with specific  
112 subtypes. [6, 7] In order to interpret genetic risk associations in the context of biological  
113 mechanisms, a pertinent question is whether the newly identified stroke-associated loci truly  
114 confer risk across all stroke subtypes, or whether isolated or combinations of subtypes are  
115 affected. At least one of the novel variants (on chromosome 1q22) shows association with  
116 both ischaemic and haemorrhagic stroke, which might point to some shared mechanisms  
117 underlying these clinically distinct entities, which have thus far been separated in genetic  
118 studies.

119

120 Conventional approaches to GWAS, which employ within study analysis and subsequent  
121 meta-analysis across groups, do not enable detailed model comparison across different  
122 subgroups. In this analysis, we used multinomial logistic regression on well-characterized  
123 subjects with individual-level data to investigate the association of all identified genetic GWAS  
124 loci to date with all stroke subtypes (cardioembolic (CES), large artery stroke (LAS), small  
125 vessel stroke (SVS) and intracerebral haemorrhage (ICH)), determining the most likely  
126 combination of stroke subtypes affected at each locus. We performed our analysis using two  
127 established subtyping approaches: the Trial of Org 10172 in Acute Stroke Treatment (TOAST),  
128 [8] and Causative Classification of Stroke (CCS) system,[9] to provide a comprehensive  
129 account of these loci across available classification systems. Our overall aim was to evaluate  
130 genetic loci identified in previous studies using stroke datasets with well-defined phenotyping  
131 to determine if subtype specificity or cross-subtype associations could be identified.

132

## 133 **Methods**

### 134 *Cohort Characteristics*

135 The data used in this analysis were derived from several sources: the NINDS-SIGN Stroke  
136 Genetics study, [10] the Wellcome Trust Case Control Consortium 2 Stroke and ImmunoChip  
137 studies, [6, 11] the UK Young Lacunar Stroke Study, [12] Genetics of Cerebral Hemorrhage  
138 with Anticoagulation (GOCHA), [13] Genetic and Environmental Risk Factors for  
139 Hemorrhagic Stroke (GERFHS), [13] Cambridge ICH Genetics Study. Almost all samples  
140 (>95%) were included in the previous MEGASTROKE genome-wide association study of  
141 stroke. [5]

142

### 143 *Stroke Phenotyping*

144 Stroke was defined according to the World Health Organization (WHO), i.e. rapidly developing  
145 signs of focal (or global) disturbance of cerebral function, lasting more than 24 hours or leading  
146 to death with no apparent cause other than that of vascular origin. Strokes were defined as  
147 ischaemic stroke (IS) or intracerebral haemorrhage (ICH) based on clinical and imaging  
148 criteria. ICH stroke events were divided into lobar or deep, which have different presumed  
149 etiology, [3] based on location of the primary event. Ischaemic stroke cases were classified  
150 under the TOAST or CCS stroke classification systems (causative and phenotypic), or both.  
151 [8, 9] TOAST and CCS both include an 'undetermined ischaemic stroke' group (UND) denoting  
152 individuals for which it is not possible to determine the ischaemic stroke subtype. Full details  
153 are provided in Additional Files 1-2.

154

#### 155 *Genotyping and Imputation*

156 Genotyping of datasets has been described in detail elsewhere. [6, 10-13] In this analysis, we  
157 imputed all datasets to the Haplotype Reference Consortium 1.1 panel, using the Michigan  
158 Imputation Server. [14] For each separately imputed dataset, we extracted SNPs with  
159 MAF>1% and imputation INFO values>0.8. All datasets were subsequently merged using  
160 bcftools and SNPs with a MAF>5% in the combined dataset and present in 66% of samples  
161 were included in further analyses.[15] We removed any duplicate or related (3<sup>rd</sup> degree or  
162 closer) samples at this stage and calculated ancestry informative principal components on a  
163 linkage-disequilibrium pruned subset of SNPs on the remaining individuals using the --pca  
164 approx function in plink 2.0.[16]

165

#### 166 *Locus and SNP Selection*

167 For each locus associated with stroke or stroke subtypes at genome-wide significance in  
168 MEGASTROKE,[5] we identified all SNPs in LD ( $r^2>0.2$ ) with the lead reported SNP based on  
169 the five European populations from 1000 Genomes.[17] These SNPs were then extracted from

170 the merged dataset for analysis. We did not analyse two regions from MEGASTROKE: *RGS7*  
171 and *TMFSF1-TMFSF4*, as the previously associated variants in these regions were low  
172 frequency variants that were filtered out in our analysis. We additionally considered the  
173 *COL4A2* locus as it been robustly associated with stroke phenotypes in other large-scale  
174 studies. [18]

175

### 176 *Multinomial Logistic Regression*

177 We used a Bayesian multinomial logistic regression approach, implemented in *Trinculo*, [19]  
178 to evaluate the association of SNPs at each locus. Multinomial logistic regression is a natural  
179 extension of logistic regression that enables modelling of multiple phenotypic categories  
180 simultaneously against a common set of controls. The benefit of this approach, which is  
181 leveraged in this analysis, is that it enables comparison of models that include different  
182 combinations of phenotypes. In the context of genetic studies, this enables determination of  
183 the combination of phenotypes that are mostly likely to be associated with the genetic variant  
184 of interest.

185 We used the default prior, which assumes effect sizes are independent with variances of 0.04.  
186 All analyses included eight ancestry-informative principal components, and batch covariates  
187 for each study.

188 Based on their association at genome-wide significance in previous analyses, we assumed a  
189 *priori* that each region was associated with stroke. However, to avoid overfitting for weakly  
190 associated loci in our data, we performed model selection only for loci that had a Bayes Factor  
191 of at least 4 in either TOAST or CCS analyses.

192 No prior genome-wide association study of stroke has identified a significant association with  
193 strokes of undetermined or cryptogenic cause. Given that this study was intended to evaluate  
194 potential shared mechanisms between subtypes, we excluded strokes of undetermined cause  
195 in model fitting.



196

197 *Statistical Analysis*

198 For each locus we performed the following steps:

- 199 1. Use multinomial logistic regression to model the association between each genetic variant  
200 and stroke subtypes under TOAST and CCS classifications, in each case including ICH  
201 as an additional outcome. We therefore tested a common set of Controls against CES,  
202 LAS, SVS, UND, and ICH cases.
- 203 2. Identify the most significant SNP in the locus under any classification system
- 204 3. For this SNP, calculate marginal likelihoods for all combinations of phenotypes
- 205 4. Identify the combination of phenotypes with the largest marginal likelihood (discarding any  
206 groups containing UND) and infer that this indicates the most likely combination of  
207 phenotypes for which the SNP confers risk

208

209

210 **Results**

211 After QC, there were up to 16,664 cases and 32,792 controls remaining for analysis (Table 1).

212 In the merged dataset, a binomial genome-wide analysis of all cases against controls had a  
213 genomic inflation  $\lambda=1.09$ , while the LDSCORE intercept value was 1.04, [20] suggesting  
214 that the majority of inflation was due to polygenicity and that any bias introduced by merging  
215 the datasets was minimal. A comparison of odds ratios for analysed loci from MEGASTROKE  
216 and the most recent ICH publication with those from our analysis showed high consistency  
217 ( $r^2=0.95$ , Additional File 3) despite slightly differing samples.

218

219 Sixteen loci contained SNPs with Bayes factors of at least 4 in either TOAST or CCS analyses.

220 We took these sixteen loci forward for further model selection. Plots for all loci under each

221 classification system are provided in Additional Files 4-19. For each of the sixteen loci, we  
222 identified the most likely combination of associated phenotypes at each locus (Figure 1) based  
223 on model selection. Apart from one locus (*FOXF2*), we found identical results between the two  
224 CCS systems, so for simplicity of presentation results for CCS causative are presented only.

225

226 For seven loci, the combination of phenotypes most likely to be influenced by the lead genetic  
227 variant at the loci included both ischaemic and haemorrhagic stroke subtypes. Four of these  
228 are shown in Figure 2. At these four loci: *EDNRA*, *1q22*, *MMP12*, *SH3PXD2A*, the ischaemic  
229 subtype included SVS, highlighting shared mechanisms underlying ICH and SVS, likely  
230 through predisposition to cerebral small vessel disease. At the *EDNRA* locus, the direction of  
231 association for ICH was opposite to that for LAS and SVS, pointing to contrasting influence on  
232 ischaemic and haemorrhagic stroke risk. We explored whether ICH-associated loci were  
233 specific to deep or lobar ICH. As in previous reports, [13, 18] associations at *1q22* and  
234 *COL4A2* appear to be specific to deep ICH, with no effect in lobar ICH. For other regions, the  
235 evidence for specificity was more equivocal (Additional File 20).

236

237 For four loci: *HDAC9*, *PITX2*, *ZFH3*, *ANK2*, only one phenotype was affected by the lead  
238 variant (Figure 1, Additional Files 13, 16, 19, 8) in the most likely configuration across all  
239 classification systems. Several other loci: *9p21*, *12q24*, *16q24*, *FOXF2* were associated with  
240 only one phenotype under particular classification systems, but did not show consistency  
241 across TOAST and CCS (Additional Files 5, 6, 7, 12). For *TSPAN2*, which was previously  
242 identified as being associated with LAS, [10] the best-fit model also included CES under CCS,  
243 albeit with a much weaker effect than LAS (rs17479660; CES, OR=1.08; LAS, OR=1.19 under  
244 CCS). Echoing previous results, the locus showed much stronger significance under CCS  
245 classifications than under TOAST (Additional File 18).

246

247 For *COL4A2*, the strongest association found under TOAST was for rs9515201. The most  
248 likely model contained ICH (OR=1.14) and SVS (OR=1.13), consistent with findings from  
249 previous analyses. [18] However, under CCS an alternate SNP, rs1927349, was the strongest  
250 associated. No association with SVS was observed, and a weak association with CES was  
251 observed instead. Reasons for this discrepancy between CCS and TOAST are not  
252 immediately clear, but non-overlapping samples between the two classification systems are a  
253 likely factor.

254

255 The mean (SD) number of stroke subtypes affected at each locus were 1.88 (0.89) under  
256 TOAST and 1.69 (0.87) under CCS. Under CCS, the most common combination of affected  
257 subtypes was SVS and ICH (4 loci).

258

## 259 **Discussion**

260 We performed a large-scale genetic analysis, characterising the effects of established stroke  
261 risk loci with ischaemic and haemorrhagic stroke subtypes in up to 16,664 cases and 32,792  
262 controls.

263

264 Our main findings are twofold. First, for the vast majority of loci studied, multiple but never all  
265 stroke subtypes were affected at the locus. Only one locus (12q24) was assumed to influence  
266 all ischaemic stroke subtypes. This indicates that although these loci were identified in  
267 analyses of inclusive stroke phenotypes, in the main their effects are specific to particular  
268 combinations of stroke subtypes. The mean number of subtypes affected was 1.88 for TOAST  
269 and 1.69 for CCS classification systems. Notable exceptions were the *PITX2* and *ZFH3* loci,  
270 which were associated with cardioembolic stroke most likely through atrial fibrillation, and  
271 *HDAC9* which is associated with large vessel stroke. Under TOAST, the *FOXF2* locus was

272 associated solely with SVS. However, under CCS, LAS was also implicated. For CCS, the  
273 9p21 locus was predicted to influence only LAS. However, under TOAST, SVS was also  
274 implicated. Our analyses suggest that *ANK2* confers risk of stroke predominantly through its  
275 influence on *ICH*. We were unable to identify any loci for which the most likely model included  
276 all stroke phenotypes in the same direction and only one (12q24) which for which the most  
277 likely model included all ischaemic stroke subtypes.

278

279 Secondly, we find evidence that several loci influence both haemorrhagic and ischaemic  
280 stroke. This was evident for seven loci in total (1q22, *COL4A2*, *EDNRA*, *LINC01492*, *MMP12*,  
281 *SH3PXD2A*, *CDK6*). Under CCS, 4 loci (*SH3PXD2A*, *MMP12*, *EDNRA*, 1q22) influenced both  
282 SVS and ICH, highlighting shared mechanisms underlying small vessel disease. Previous  
283 GWAS analyses have tended to separate ischaemic and haemorrhagic stroke on the basis of  
284 presumed differing etiologies. Our results suggest that including haemorrhagic alongside  
285 ischaemic stroke in multiphenotype analyses will provide further insights.

286

287 For one locus: Endothelin Receptor Type A (*EDNRA*), the association with ICH was in the  
288 opposite direction to the ischaemic stroke subtypes, suggesting opposing risk mechanisms.  
289 This locus has previously been associated with a variety of vascular phenotypes, including  
290 coronary artery disease, carotid plaques, and peripheral arterial disease (in concordant  
291 direction with ischaemic stroke), as well as intracranial aneurysm (in concordant direction with  
292 intracerebral haemorrhage). [21-24] The locus has also been associated with migraine in  
293 candidate gene studies, [25] but this has not been validated in GWA studies. [26] *EDNRA*  
294 encodes the type A receptor ( $ET_A$ ) for Endothelin-1 (*ET-1*), a potent vasoconstrictor with pro-  
295 inflammatory effects.  $ET_A$ -specific antagonists increase Nitric Oxide (NO)-mediated  
296 endothelium-dependent relaxation, reduce *ET-1* levels and inhibit atherosclerosis in mice, [27]  
297 suggesting that higher levels of  $ET_A$  are pro-atherogenic: consistent with the observation that

298 higher  $ET_A$  levels are observed in atherosclerotic plaques. [28] This is also consistent with the  
299 C allele of rs17612742 in our study leading to increased risk of ischaemic stroke through  
300 elevated  $ET_A$  levels. Indeed, in GWA studies of intracranial aneurysm the susceptibility variant  
301 (in LD with the T allele of rs17612742 in our study) was shown to result in higher transcription  
302 factor binding affinity, likely resulting in repression of the transcriptional activity of *EDNRA*.  
303 [23] The reason why lower levels of  $ET_A$  might promote intracranial aneurysm and  
304 intracerebral haemorrhage is not immediately obvious, but several mechanisms are possible.  
305 Levels of *ET-1* have been linked to vascular remodelling, an important process underlying ICH  
306 and IA; [29, 30] subtle changes in this process induced by altered availability of  $ET_A$  is one  
307 such mechanism. Deep ICH and ischaemic SVS arise due to the same arteriopathy that arises  
308 in the deep perforating arteries of the brain. The *EDNRA* variant in this study points to a  
309 mechanism that influences whether the resulting pathology is ischaemic or haemorrhagic, and  
310 as such warrants further detailed investigation.

311

312 Some loci were notably more significant when phenotyped using CCS; *SH3XPD2A*, *MMP12*,  
313 *TSPAN2*, *FOXF2*, *EDNRA*, which might point to CCS having greater accuracy and therefore  
314 utility in stroke GWA studies. However, the opposite was also true for others: *16q24*, *HDAC9*.  
315 We note that some differences may be due to the fact that not all individuals were subtyped  
316 under both CCS and TOAST; the TOAST cohort was a least 20% larger. A detailed discussion  
317 of the relative merits of TOAST and CCS is beyond the scope of this article, but our results  
318 highlight that the importance of collecting individual phenotypic qualities that make up the  
319 etiologic subtypes in genetic studies of stroke so that associated loci can be more  
320 systematically examined.

321

322 Our study has several strengths. The dataset was a large stroke population including  
323 intracerebral haemorrhage and ischaemic stroke cases, the majority of which were subtyped

324 under both TOAST and CCS. We had full access to genotype-level data enabling us full control  
325 over all analyses. Similarly there are limitations. We present results for the most likely  
326 combination of stroke phenotypes affected at each locus: the 'best-fitting' model. We had  
327 limited statistical power to determine with statistical certainty that this was the correct model;  
328 significantly larger samples would be required to achieve this. Due to the challenges of  
329 performing these analyses across different ancestry populations, we performed analyses in  
330 European populations only. The results can therefore not be generalized to all populations. In  
331 all analyses we assume there is a single causal variant at the locus, which may not be true in  
332 all cases. Our analyses are based on use of a default prior, which has been used in many  
333 genetic studies. An alternative is to derive an empirical prior from associated genetic loci. As  
334 more loci are identified as being associated with stroke, this will become a more realistic  
335 possibility and should be explored in future analyses.

336

## 337 **Conclusions**

338 Our findings suggest that although large scale genome-wide studies of broad 'all stroke' or 'all  
339 ischaemic stroke' phenotypes are able to identify multiple associations, it should not be  
340 assumed that such associations confer risk equally across stroke subtypes. Heterogeneity in  
341 the influence of genetic variants on different stroke subtypes is the norm, not the exception.  
342 Analyses such as the current one provide insights into the etiological stroke subtypes most  
343 prominently influenced by genetic variants at these loci – a prerequisite to decide on the most  
344 appropriate model systems to choose for further mechanistic studies. Stroke is a complex,  
345 heterogeneous disorder: our findings highlight the ongoing need for large, well phenotyped  
346 case collections and tailored analytic strategies to decipher the underlying genetic  
347 mechanisms.

348

## 349 **Abbreviations**

350 CES, cardioembolic stroke; LAS large artery stroke; SVS, small vessel stroke; ICH,  
351 intracerebral haemorrhage; SNP, single nucleotide polymorphism.

352

### 353 **Acknowledgements**

354 This work was supported by a British Heart Foundation Programme Grant (RG/16/4/32218).  
355 The NINDS-SIGN study was funded by the US National Institute of Neurological Disorders  
356 and Stroke, National Institutes of Health (U01 NS069208 and R01 NS100178). Collection of  
357 the UK Young Lacunar Stroke DNA Study (DNA Lacunar) was primarily supported by the  
358 Wellcome Trust (WT072952) with additional support from the Stroke Association (TSA  
359 2010/01). Genotyping of the DNA Lacunar samples was supported by a Stroke Association  
360 Grant (TSA 2013/01). The principal funding for the WTCCC2 stroke study was provided by  
361 the Wellcome Trust, as part of the Wellcome Trust Case Control Consortium 2 project  
362 (085475/B/08/Z and 085475/Z/08/Z and WT084724MA). Hugh Markus is supported by a  
363 National Institute for Health Research (NIHR) Senior Investigator award, and his work is  
364 supported by the Cambridge Universities NIHR Comprehensive Biomedical Research Centre.  
365 Dr. Anderson is supported by NIH R01NS103924 and K23NS086873.

366

### 367 **Author's Contributions**

368 MT and RM designed the experiments. MT and MC performed the imputations. MT performed  
369 the statistical analyses. MT, CDA, LCARJ, HSM, DW, and RM wrote the first draft of the  
370 manuscript. All authors read and approved the final manuscript.

371

### 372 **Ethics approval and consent to participate**

373 All research participants contributing clinical and genetic samples for analysis in this study  
374 provided written informed consent.

375

#### 376 **Availability of data and materials**

377 Data from the NINDS-SIGN Stroke study are available to researchers through dbGAP:

378 [https://www.ncbi.nlm.nih.gov/projects/gap/cgi-bin/study.cgi?study\\_id=phs000615.v1.p1](https://www.ncbi.nlm.nih.gov/projects/gap/cgi-bin/study.cgi?study_id=phs000615.v1.p1).

379 Trinculo v0.96 is available from: <https://sourceforge.net/projects/trinculo/files/>

380

#### 381 **Competing interests**

382 Dr. Anderson has consulted for ApoPharma, Inc.



## 383 **References**

- 384 1. Global, regional, and national disability-adjusted life-years (DALYs) for 333 diseases  
385 and injuries and healthy life expectancy (HALE) for 195 countries and territories,  
386 1990-2016: a systematic analysis for the Global Burden of Disease Study 2016.  
387 *Lancet* 2017, 390:1260-1344.
- 388 2. Visscher PM, Wray NR, Zhang Q, Sklar P, McCarthy MI, Brown MA, et al: 10 Years  
389 of GWAS Discovery: Biology, Function, and Translation. *Am J Hum Genet* 2017,  
390 101:5-22.
- 391 3. Martini SR, Flaherty ML, Brown WM, Haverbusch M, Comeau ME, Sauerbeck LR, et  
392 al: Risk factors for intracerebral hemorrhage differ according to hemorrhage location.  
393 *Neurology* 2012, 79:2275-2282.
- 394 4. Hankey GJ: Stroke. *Lancet* 2017, 389:641-654.
- 395 5. Malik R, Chauhan G, Traylor M, Sargurupremraj M, Okada Y, Mishra A, et al:  
396 Multiancestry genome-wide association study of 520,000 subjects identifies 32 loci  
397 associated with stroke and stroke subtypes. *Nat Genet* 2018, 50:524-537.
- 398 6. Bellenguez C, Bevan S, Gschwendtner A, Spencer CC, Burgess AI, Pirinen M, et al:  
399 Genome-wide association study identifies a variant in HDAC9 associated with large  
400 vessel ischemic stroke. *Nat Genet* 2012, 44:328-333.
- 401 7. Traylor M, Farrall M, Holliday EG, Sudlow C, Hopewell JC, Cheng YC, et al: Genetic  
402 risk factors for ischaemic stroke and its subtypes (the METASTROKE collaboration):  
403 a meta-analysis of genome-wide association studies. *Lancet Neurol* 2012, 11:951-  
404 962.
- 405 8. Adams HP, Jr., Bendixen BH, Kappelle LJ, Biller J, Love BB, Gordon DL, et al:  
406 Classification of subtype of acute ischemic stroke. Definitions for use in a multicenter  
407 clinical trial. TOAST. Trial of Org 10172 in Acute Stroke Treatment. *Stroke* 1993,  
408 24:35-41.

- 409 9. Ay H, Benner T, Arsava EM, Furie KL, Singhal AB, Jensen MB, et al: A computerized  
410 algorithm for etiologic classification of ischemic stroke: the Causative Classification of  
411 Stroke System. *Stroke* 2007, 38:2979-2984.
- 412 10. Loci associated with ischaemic stroke and its subtypes (SiGN): a genome-wide  
413 association study. *Lancet Neurol* 2016, 15:174-184.
- 414 11. Kilarski LL, Achterberg S, Devan WJ, Traylor M, Malik R, Lindgren A, et al: Meta-  
415 analysis in more than 17,900 cases of ischemic stroke reveals a novel association at  
416 12q24.12. *Neurology* 2014, 83:678-685.
- 417 12. Traylor M, Bevan S, Baron JC, Hassan A, Lewis CM, Markus HS: Genetic  
418 Architecture of Lacunar Stroke. *Stroke* 2015, 46:2407-2412.
- 419 13. Woo D, Falcone GJ, Devan WJ, Brown WM, Biffi A, Howard TD, et al: Meta-Analysis  
420 of Genome-Wide Association Studies Identifies 1q22 as a Susceptibility Locus for  
421 Intracerebral Hemorrhage. *Am J Hum Genet* 2014, 94:511-521.
- 422 14. McCarthy S, Das S, Kretzschmar W, Delaneau O, Wood AR, Teumer A, et al: A  
423 reference panel of 64,976 haplotypes for genotype imputation. *Nat Genet* 2016,  
424 48:1279-1283.
- 425 15. Danecek P, Auton A, Abecasis G, Albers CA, Banks E, DePristo MA, et al: The  
426 variant call format and VCFtools. *Bioinformatics* 2011, 27:2156-2158.
- 427 16. Chang CC, Chow CC, Tellier LC, Vattikuti S, Purcell SM, Lee JJ: Second-generation  
428 PLINK: rising to the challenge of larger and richer datasets. *Gigascience* 2015, 4:7.
- 429 17. Abecasis GR, Auton A, Brooks LD, DePristo MA, Durbin RM, Handsaker RE, et al:  
430 An integrated map of genetic variation from 1,092 human genomes. *Nature* 2012,  
431 491:56-65.
- 432 18. Rannikmae K, Sivakumaran V, Millar H, Malik R, Anderson CD, Chong M, et al:  
433 COL4A2 is associated with lacunar ischemic stroke and deep ICH: Meta-analyses  
434 among 21,500 cases and 40,600 controls. *Neurology* 2017, 89:1829-1839.

- 435 19. Jostins L, McVean G: Trinculo: Bayesian and frequentist multinomial logistic  
436 regression for genome-wide association studies of multi-category phenotypes.  
437 *Bioinformatics* 2016, 32:1898-1900.
- 438 20. Bulik-Sullivan BK, Loh PR, Finucane HK, Ripke S, Yang J, Patterson N, et al: LD  
439 Score regression distinguishes confounding from polygenicity in genome-wide  
440 association studies. *Nat Genet* 2015, 47:291-295.
- 441 21. Bis JC, Kavousi M, Franceschini N, Isaacs A, Abecasis GR, Schminke U, et al: Meta-  
442 analysis of genome-wide association studies from the CHARGE consortium identifies  
443 common variants associated with carotid intima media thickness and plaque. *Nat*  
444 *Genet* 2011, 43:940-947.
- 445 22. Howson JMM, Zhao W, Barnes DR, Ho WK, Young R, Paul DS, et al: Fifteen new  
446 risk loci for coronary artery disease highlight arterial-wall-specific mechanisms. *Nat*  
447 *Genet* 2017, 49:1113-1119.
- 448 23. Low SK, Takahashi A, Cha PC, Zembutsu H, Kamatani N, Kubo M, et al: Genome-  
449 wide association study for intracranial aneurysm in the Japanese population identifies  
450 three candidate susceptible loci and a functional genetic variant at EDNRA. *Hum Mol*  
451 *Genet* 2012, 21:2102-2110.
- 452 24. Matsukura M, Ozaki K, Takahashi A, Onouchi Y, Morizono T, Komai H, et al:  
453 Genome-Wide Association Study of Peripheral Arterial Disease in a Japanese  
454 Population. *PLoS One* 2015, 10:e0139262.
- 455 25. Tzourio C, El Amrani M, Poirier O, Nicaud V, Bousser MG, Alperovitch A: Association  
456 between migraine and endothelin type A receptor (ETA -231 A/G) gene  
457 polymorphism. *Neurology* 2001, 56:1273-1277.
- 458 26. Gormley P, Anttila V, Winsvold BS, Palta P, Esko T, Pers TH, et al: Meta-analysis of  
459 375,000 individuals identifies 38 susceptibility loci for migraine. *Nat Genet* 2016,  
460 48:856-866.
- 461 27. Barton M, Haudenschild CC, d'Uscio LV, Shaw S, Munter K, Luscher TF: Endothelin  
462 ETA receptor blockade restores NO-mediated endothelial function and inhibits

- 463 atherosclerosis in apolipoprotein E-deficient mice. *Proc Natl Acad Sci U S A* 1998,  
464 95:14367-14372.
- 465 28. Ramzy D, Rao V, Tumiaty LC, Xu N, Sheshgiri R, Miriuka S, et al: Elevated  
466 endothelin-1 levels impair nitric oxide homeostasis through a PKC-dependent  
467 pathway. *Circulation* 2006, 114:1319-326.
- 468 29. Penn DL, Witte SR, Komotar RJ, Sander Connolly E, Jr.: The role of vascular  
469 remodeling and inflammation in the pathogenesis of intracranial aneurysms. *J Clin*  
470 *Neurosci* 2014, 21:28-32.
- 471 30. Amiri F, Viridis A, Neves MF, Iglarz M, Seidah NG, Touyz RM, et al: Endothelium-  
472 restricted overexpression of human endothelin-1 causes vascular remodeling and  
473 endothelial dysfunction. *Circulation* 2004, 110:2233-2240.

474

475

476 **Tables and Figures**

477 **Table 1.** Sample Sizes

| Classification System | CES  | LAS  | SVS  | UND  | ICH  | Controls |
|-----------------------|------|------|------|------|------|----------|
| TOAST                 | 3847 | 2803 | 3976 | 4085 | 1953 | 32,792   |
| CCS                   | 2826 | 2204 | 3093 | 4013 | 1953 | 28,052   |

478 CES, cardioembolic Stroke; LAS, large artery atherosclerotic stroke; SVS, small artery  
479 occlusion stroke; UND, stroke of undetermined etiology; ICH, intracerebral haemorrhage;  
480 TOAST, Trial of Org 10172 Acute Stroke Treatment Classification System; CCS, Causative  
481 Classification of Stroke System (causative system).

482

483

484 **Figure 1.** Stroke Subtypes in Best Fitting Model at Each Locus, for CCSc, CCSp, and TOAST  
 485 classification Systems, with Size Weighted by Association Odds Ratio

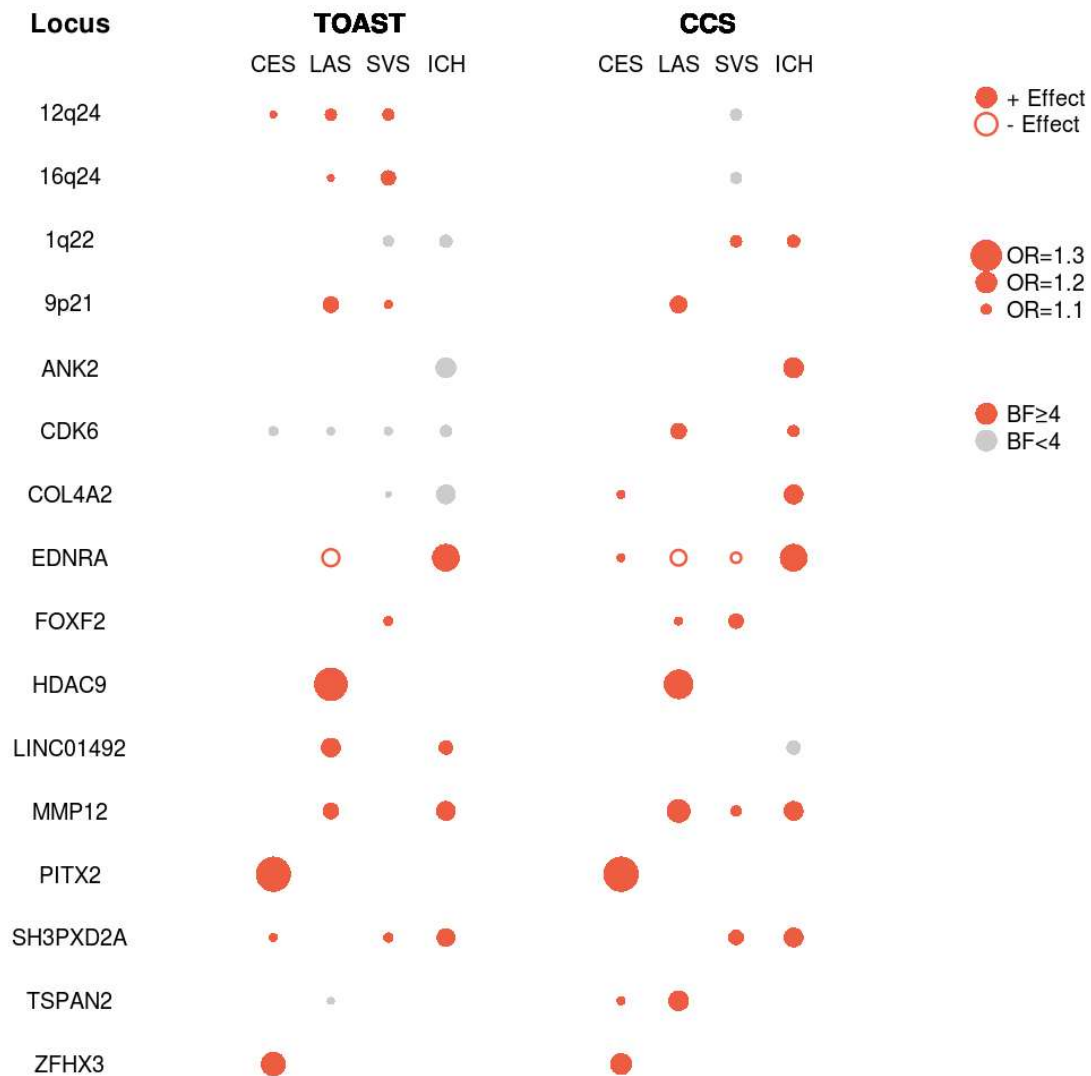

486

487 CES, Cardioembolic Stroke; LAS, Large artery Stroke; SVS, Small Vessel Stroke; ICH,  
 488 Intracerebral Haemorrhage. Results are presented for the 16 loci showing BF>4 in CCS or  
 489 TOAST analyses. Classification/Locus combinations in grey indicate that the locus did not  
 490 reach BF>4 in that analysis.

491

492 **Figure 2.** Local Plots showing Associations with 4 Regions Conferring Risk of Ischaemic and  
 493 Haemorrhagic Stroke and Odds Ratios for all stroke Subtypes

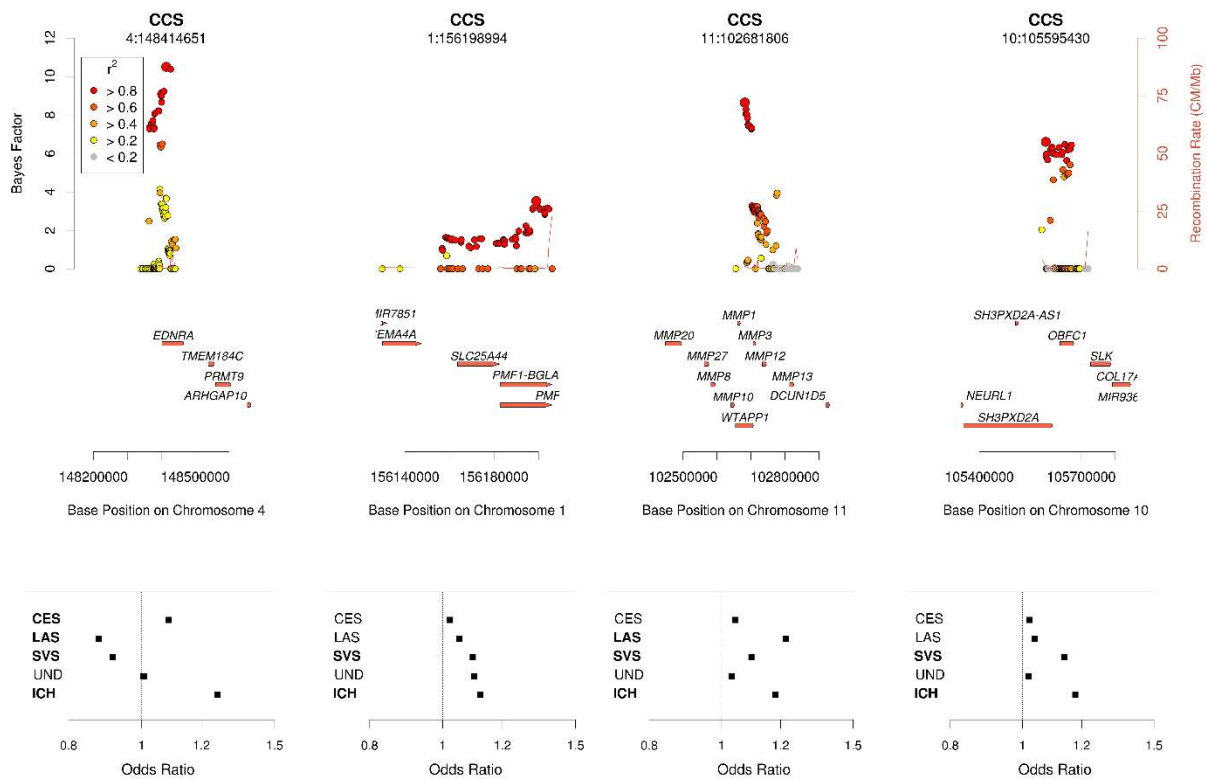

494

495 CE, cardioembolic stroke; LAS, large artery atherosclerotic stroke; SVS, small vessel stroke;  
 496 ICH, intracerebral haemorrhage. Results are presented for the classification system in which  
 497 the locus showed strongest significance. Stroke subtypes in bold indicate those included in  
 498 the best fitting model and therefore predicted to be influenced by the lead genetic variant,  
 499 based on Bayesian model selection.

500

501 **Additional Files**

502 **Additional File 1.** Stroke Phenotyping

503

504 **Additional File 2.** Cohort Descriptions

505

506 **Additional File 3.** Comparison of log(odds ratio) from most recent publication with those from  
507 this analysis for 16 SNPs tested in this analysis

508 ICH, Intracerebral haemorrhage; CES, cardioembolic stroke; LAS, large artery stroke; SVS,  
509 small vessel stroke. Where the lead SNP from previous publication was not available, [5, 13]  
510 we used the nearest proxy ( $r^2 > 0.6$  in all cases). No SNPs in the 12q24 region passed QC in  
511 the most recent ICH publication so are not included here.

512

513 **Additional File 4.** 1q22 Region

514

515 **Additional File 5.** 9p21 Region

516

517 **Additional File 6.** 12q24 Region

518

519 **Additional File 7.** 16q24 Region

520

521 **Additional File 8.** ANK2 Region

522



523 **Additional File 9.** CDK6 Region

524

525 **Additional File 10.** COL4A2 Region

526

527 **Additional File 11.** EDNRA Region

528

529 **Additional File 12.** FOXF2 Region

530

531 **Additional File 13.** HDAC9 Region

532

533 **Additional File 14.** LINC01492 Region

534

535 **Additional File 15.** MMP12 Region

536

537 **Additional File 16.** PITX2 Region

538

539 **Additional File 17.** SH3PXD2A Region

540

541 **Additional File 18.** TSPAN2 Region

542

543 **Additional File 19.** ZFHX3 Region

544

545 **Additional File 20.** Odds ratios for association of ICH-associated loci with ICH subtypes, and

546 evidence for ICH subtype-specific effects

547 OR, odds ratio; BF, Bayes Factor

548

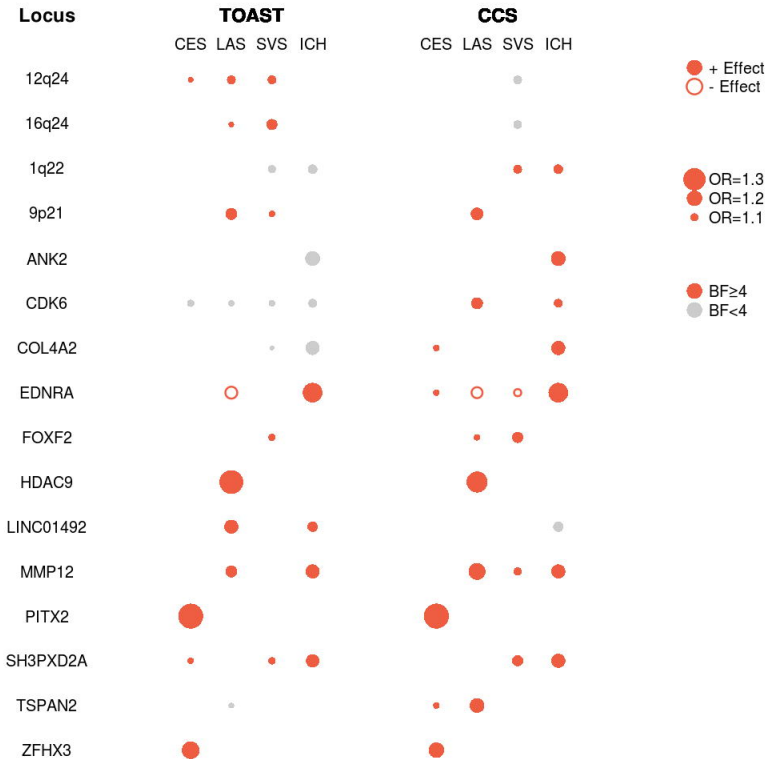

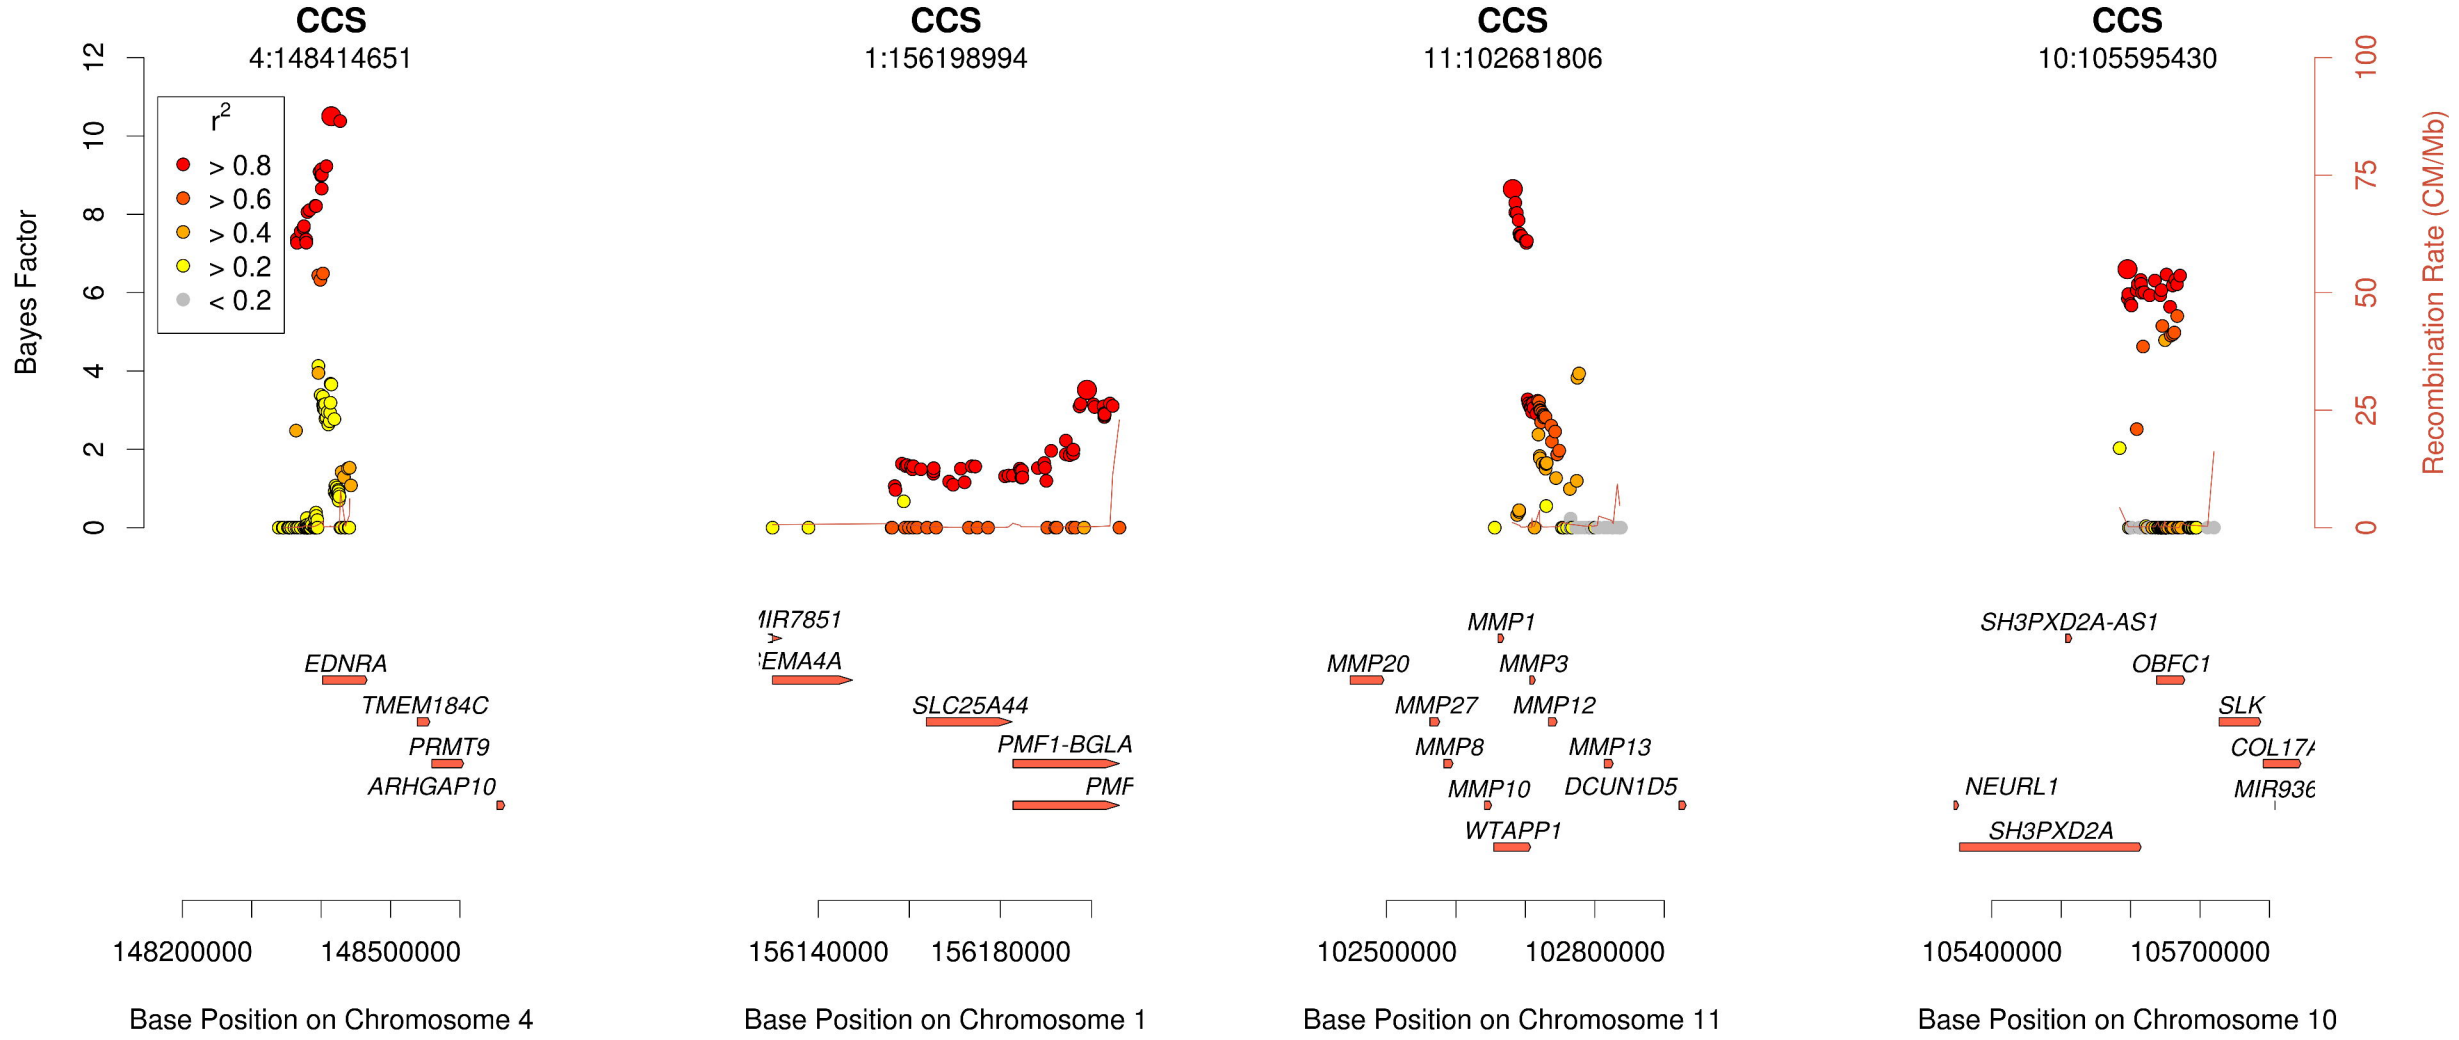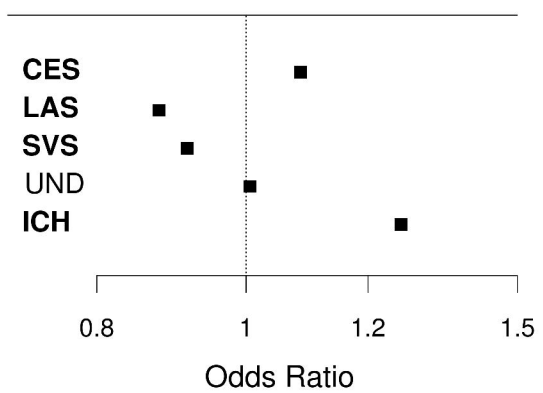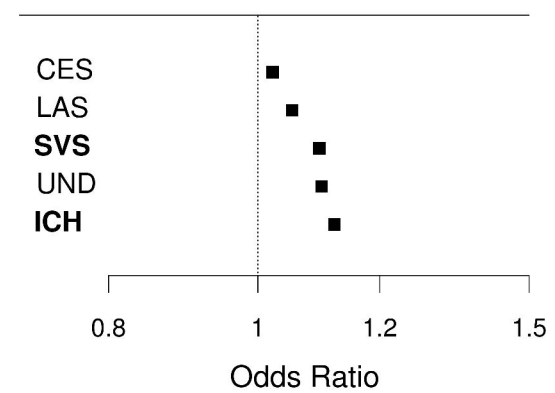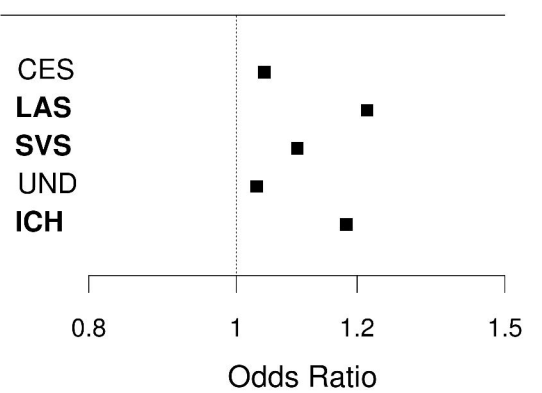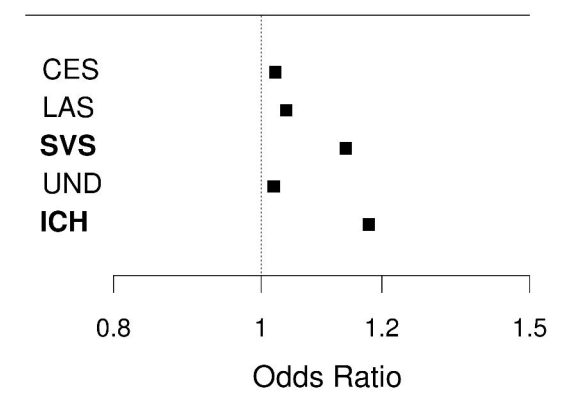

Source: https://www.biorxiv.org/content/10.1101/371153v1.full.pdf
